# Supplementary material
Source: PubMed Central journal article supplement (PMC2854835)
Supplement: NIHMS191242-supplement-Supp__Info_.pdf [file NIHMS191242-supplement-Supp__Info_.pdf]

Supplemental figure legends.

S1. Representative data from a single trial used to do kinetic analysis of dependence of cleavage rate on concentration of GlcN6P. Each panel is at a different, labeled pH. Each point is the calculated rate of the reaction for a stated pH and GlcN6P concentration for a single experiment. Three independent experiments were done to calculate the final reported  $k_{\max}$  and  $K_{1/2}$  values. In all panels, the fit is shown in a solid red line and the values of  $k_{\max}$  and  $K_{1/2}$  obtained for this experiment are displayed.

S2. Titration of GlcN6P monitored by  $^{31}\text{P}$  NMR. A. Overlay of the  $^{31}\text{P}$  spectra collected at various pHs. B. Plot of pH versus  $^{31}\text{P}$  chemical shift of GlcN6P. Fit is to equation (4) in the main text.

S3. Representative data from a single trial used to do kinetic analysis of dependence of cleavage rate on concentration of MaN6P. Each panel is at a different, labeled pH. Each point is the calculated rate of the reaction for a stated pH and MaN6P concentration for a single experiment. Three independent experiments were done to calculate the final reported  $k_{\max}$  and  $K_{1/2}$  values. In all panels, the fit is shown in a solid red line and the values of  $k_{\max}$  and  $K_{1/2}$  obtained for this experiment are displayed.

S1. Kinetic analyses of GlcN6P activation of the *glmS* ribozyme.

$K_{1/2}$  fit at pH 6

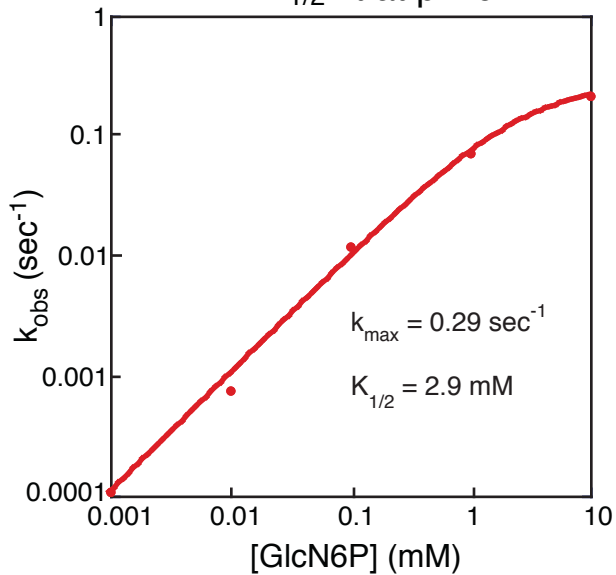

$K_{1/2}$  fit at pH 7

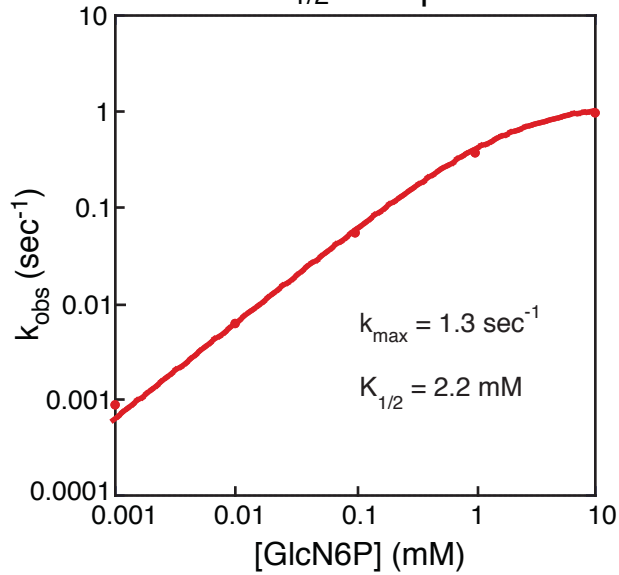

$K_{1/2}$  fit at pH 8

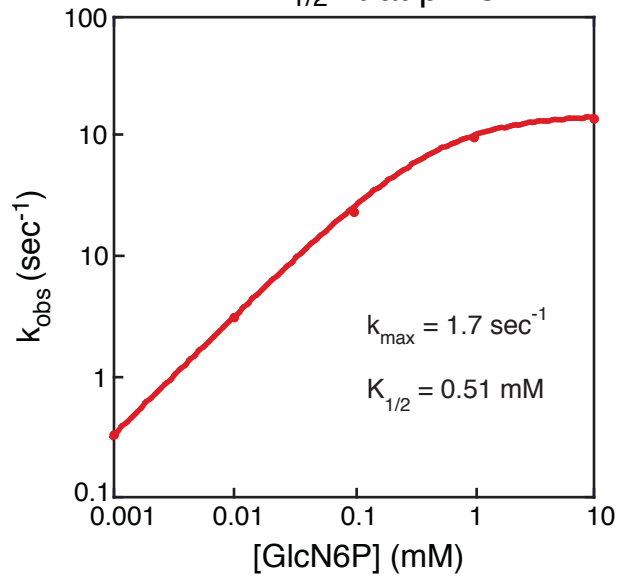

$K_{1/2}$  fit at pH 9

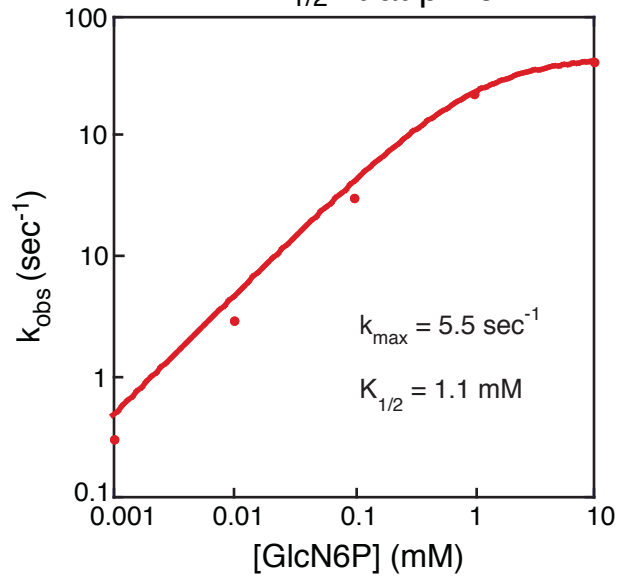

S2. Titration of GlcN6P monitored by  $^{31}\text{P}$  NMR

A

Overlay of the  $^{31}\text{P}$  spectra of GlcN6P at varying pH

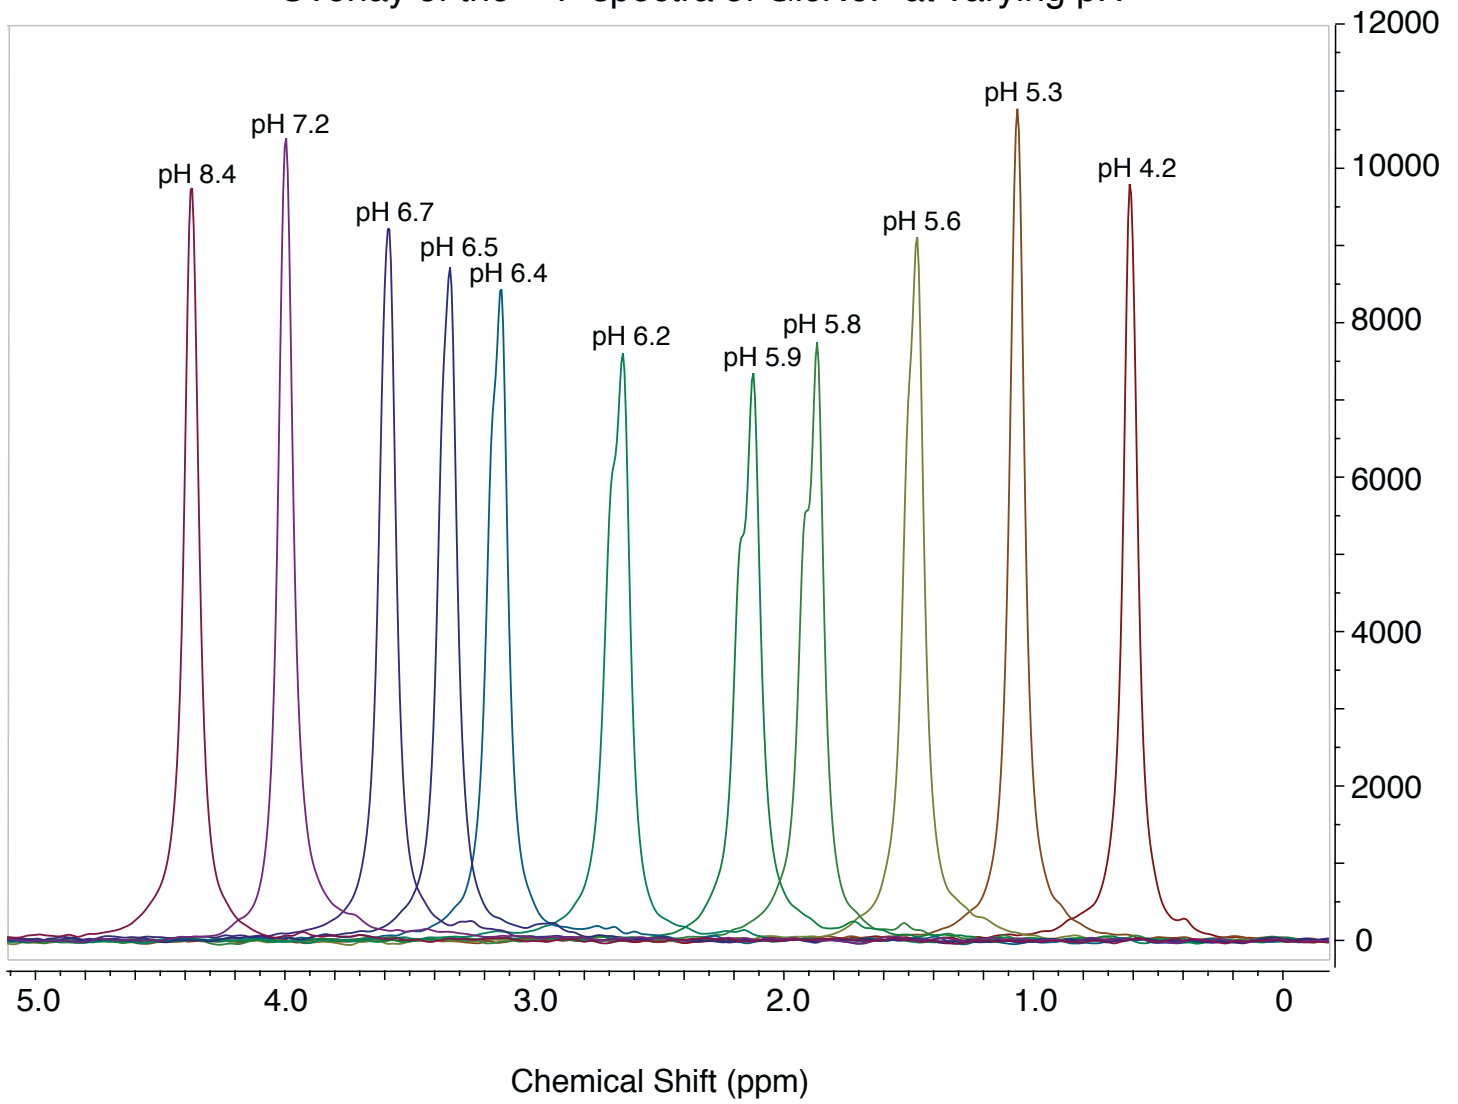

B

Titration of GlcN6P monitored by  $^{31}\text{P}$  NMR

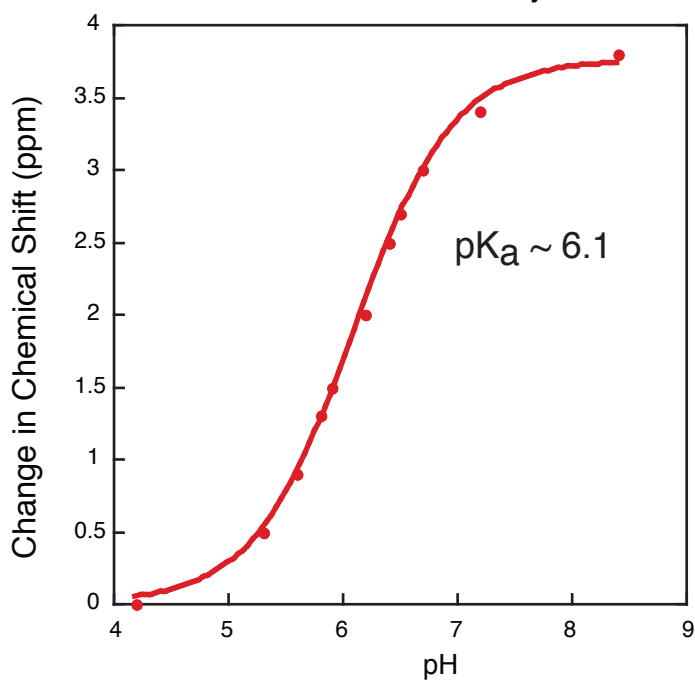

S3. Kinetic analyses of MaN6P activation of the *glmS* ribozyme.

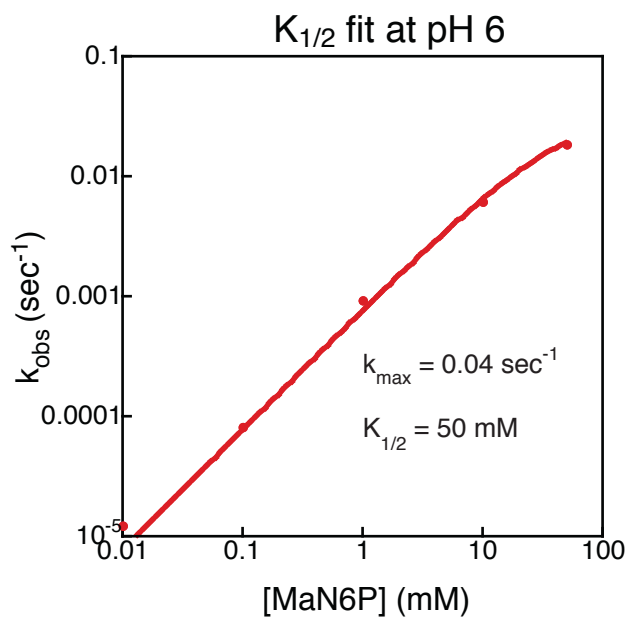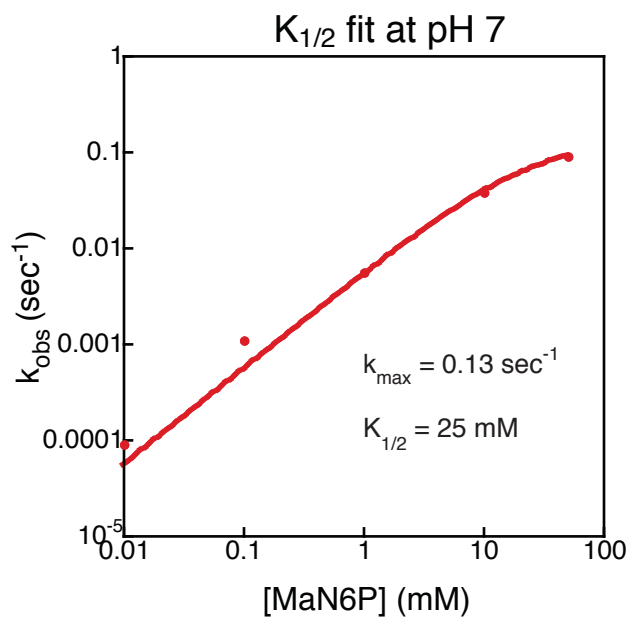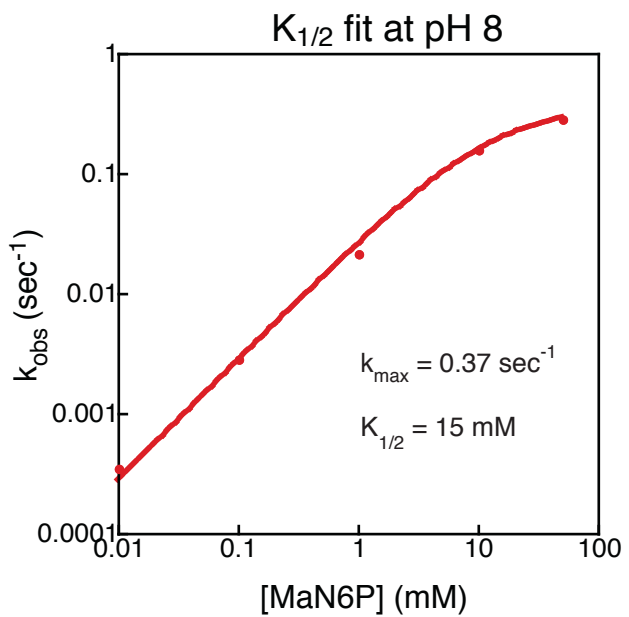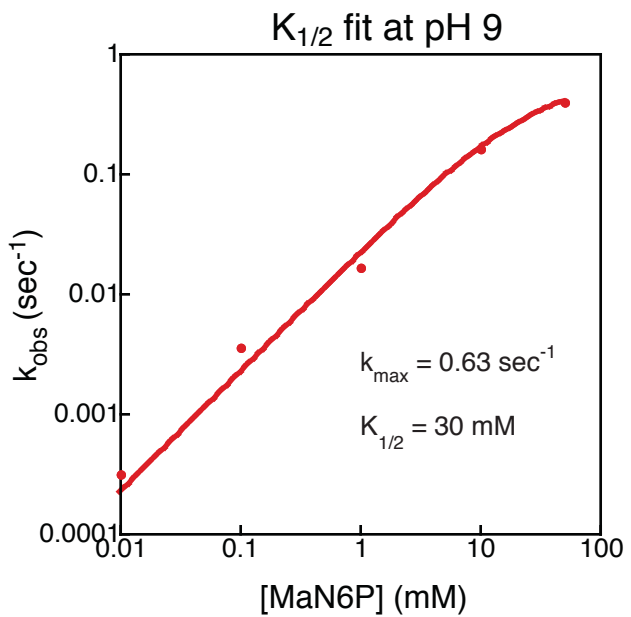

Table S1. Summary of crystallographic statistics.

|                                                             | Pre-cleavage        | Product             | G33A                | Glc6P bound         | MaN6P bound         |
|-------------------------------------------------------------|---------------------|---------------------|---------------------|---------------------|---------------------|
| <b>Data collection</b>                                      |                     |                     |                     |                     |                     |
| Space group                                                 | P2 <sub>1</sub>     |
| Cell dimensions                                             |                     |                     |                     |                     |                     |
| a, b, c (Å)                                                 | 47.4, 228.5, 103.9  | 49.6, 229.8, 101.7  | 48.4, 232.7, 106.6  | 47.9, 234.9, 104.5  | 47.4, 232.4, 104.7  |
| $\alpha$ , $\beta$ , $\gamma$ (°)                           | 90.0, 90.7, 90.0    | 90.0, 90.1, 90.0    | 90.0, 92.2, 90.0    | 90.0, 90.6, 90.0    | 90.0, 90.6, 90.0    |
| Resolution                                                  | 50-3.10 (3.21-3.10) | 50-2.90 (3.00-2.90) | 50-3.00 (3.11-3.00) | 50-2.85 (2.95-2.85) | 50-3.00 (3.11-3.00) |
| R <sub>sym</sub> (%) <sup>a</sup>                           | 21.9 (>100)         | 13.5 (>100)         | 12.0 (>100)         | 6.2 (83.2)          | 14.0 (77.9)         |
| $\langle I \rangle / \langle \sigma I \rangle$ <sup>a</sup> | 5.8 (1.3)           | 10.7 (1.3)          | 9.8 (1.3)           | 18.5 (1.1)          | 8.5 (1.6)           |
| Completeness (%) <sup>a</sup>                               | 99.4 (98.4)         | 99.6 (97.6)         | 97.6 (94.6)         | 98.5 (85.5)         | 92.9 (90.6)         |
| Redundancy <sup>a</sup>                                     | 4.0 (3.8)           | 4.0 (3.9)           | 4.1 (4.0)           | 4.0 (3.2)           | 3.9 (3.9)           |
| Wavelength (Å)                                              | 1.1                 | 1.1                 | 1.1                 | 1.1                 | 1.1                 |
| <b>Refinement</b>                                           |                     |                     |                     |                     |                     |
| Resolution (Å)                                              | 43.8-3.10           | 49.7-2.90           | 43.8-3.10           | 50.0-2.85           | 40.2-3.0            |
| No. reflections <sup>b</sup>                                | 37270 (1964)        | 47487 (2538)        | 44048 (2360)        | 49868 (2665)        | 39278 (2127)        |
| R <sub>work</sub> /R <sub>free</sub> (%)                    | 28.1/32.7           | 26.6/30.7           | 25.7/31.2           | 24.9/30.9           | 24.8/29.1           |
| R.M.S. deviations                                           |                     |                     |                     |                     |                     |
| Bond lengths (Å)                                            | 0.006               | 0.006               | 0.006               | 0.01                | 0.007               |
| Bond angles (°)                                             | 1.261               | 1.328               | 1.239               | 1.502               | 1.359               |

<sup>a</sup>Values in parentheses are for the highest resolution shell. <sup>b</sup>Values in parentheses are for the cross validation test set.

Table S2. Summary of *glmS* structures to date.

| PDB ID | Source                                  | Description                                                            | Ref. |
|--------|-----------------------------------------|------------------------------------------------------------------------|------|
| 2GCS   | <i>Thermoanaerobacter tengcongensis</i> | 2'-amino-A <sub>-1</sub> , pre-cleavage                                | 9    |
| 2GCV   | <i>Thermoanaerobacter tengcongensis</i> | Post-cleavage                                                          | 9    |
| 2HO6   | <i>Thermoanaerobacter tengcongensis</i> | Post-cleavage, all RNA crystal soaked with GlcN6P                      | 9    |
| 2HO7   | <i>Thermoanaerobacter tengcongensis</i> | Pre-cleavage, all RNA crystal soaked with Glc6P                        | 9    |
| 2HOW   | <i>Thermoanaerobacter tengcongensis</i> | 2'-amino-A <sub>-1</sub> , post-cleavage                               | 9    |
| 2H0X   | <i>Thermoanaerobacter tengcongensis</i> | 2'-amino-A <sub>-1</sub> , pre-cleavage                                | 9    |
| 2H0Z   | <i>Thermoanaerobacter tengcongensis</i> | 2'-dA <sub>-1</sub> , pre-cleavage, Glc6P bound                        | 9    |
| 2NZ4   | <i>Bacillus anthracis</i>               | 2'-oMeA <sub>-1</sub> , pre-cleavage, GlcN6P bound                     | 3    |
| 2Z74   | <i>Thermoanaerobacter tengcongensis</i> | 2'-dA <sub>-1</sub> , pre-cleavage, GlcN6P bound                       | 4    |
| 2Z75   | <i>Thermoanaerobacter tengcongensis</i> | 2'-dA <sub>-1</sub> , pre-cleavage, Glc6P bound                        | 4    |
| 3B4A   | <i>Thermoanaerobacter tengcongensis</i> | G40A, pre-cleavage, GlcN6P bound                                       | 10   |
| 3B4B   | <i>Thermoanaerobacter tengcongensis</i> | G40A, pre-cleavage, 3'-d-, 2'-5'-linked-A <sub>-1</sub> , GlcN6P bound | 10   |
| 3B4C   | <i>Thermoanaerobacter tengcongensis</i> | Pre-cleavage, 3'-d-, 2'-5'-linked-A <sub>-1</sub> , GlcN6P bound       | 10   |
|        | <i>Bacillus anthracis</i>               | 2'-oMeA <sub>-1</sub> , Pre-cleavage                                   | *    |
|        | <i>Bacillus anthracis</i>               | Post-cleavage                                                          | *    |
|        | <i>Bacillus anthracis</i>               | G33A, pre-cleavage, GlcN6P bound                                       | *    |
|        | <i>Bacillus anthracis</i>               | 2'-oMeA <sub>-1</sub> , pre-cleavage, Glc6P bound                      | *    |
|        | <i>Bacillus anthracis</i>               | 2'-oMeA <sub>-1</sub> , pre-cleavage, MaN6P bound                      | *    |

\* Presented in this work.
